# Supplementary material
Source: HighWire-hosted journal article supplement (https://heart.bmj.com/content/heartjnl-2020-318074)
Supplement: inline-supplementary-material-1 [file inline-supplementary-material-1.pdf]

**Supplementary material**  
**Table 1**

| PATIENT | AGE<br>(years) | SEX | ANATOMY | CONGENITAL<br>DEFECTS                      | CONCOMITANT<br>SURGERY OR<br>RE-<br>OPERATIONS | CARDIAC MEDICATION AT<br>BASELINE                                                      | DEVICE  | MAXIMAL TOLERATED<br>DOSE<br>SACUBITRIL/VALSARTAN | EVENTS                                                                                |
|---------|----------------|-----|---------|--------------------------------------------|------------------------------------------------|----------------------------------------------------------------------------------------|---------|---------------------------------------------------|---------------------------------------------------------------------------------------|
| 1       | 52             | F   | ccTGA   | ccTGA, VSD                                 | VSD closure                                    | Phenprocoumon,<br>hydrochlorothiazide, losartan,<br>metoprolol, isosorbide mononitrate |         | 49/51                                             |                                                                                       |
| 2       | 21             | M   | Senning | TGA, CoA,<br>intramural<br>coronary artery |                                                | Acenocoumarol, enalapril,<br>spironolacton, metoprolol                                 | CRT-D   | 97/103                                            |                                                                                       |
| 3       | 42             | F   | Senning | TGA                                        | TVP                                            | Phenprocoumon, bumetanide,<br>spironolactone, atenolol                                 | DDD-ICD | 49/51                                             |                                                                                       |
| 4       | 57             | F   | Mustard | TGA, VSD,<br>ASD, PS                       | TVP                                            | Acenocoumarol, lisinopril,<br>bumetanide, triamterene,<br>amiodarone, digoxin          | DDD-ICD | 49/51                                             |                                                                                       |
| 5       | 47             | M   | Mustard | TGA                                        |                                                | Phenprocoumon , valsartan,<br>furosemide, spironolactone, sotalol                      | PM      | 97/103                                            |                                                                                       |
| 6       | 42             | M   | Senning | TGA                                        |                                                | Irbesartan                                                                             |         | 97/103                                            |                                                                                       |
| 7       | 26             | F   | ccTGA   | ccTGA, TI                                  | TVR                                            | Phenprocoumon, losartan,<br>spironolactone                                             | CRT-P   | 49/51                                             | Stopped: Increased thirst<br>stimulus, resulting in<br>decompensation)                |
| 8       | 72             | F   | ccTGA   | ccTGA                                      |                                                | Phenprocoumon,<br>perindopril/indapamide,<br>spironolactone, furosemide,               | PM      | 49/51                                             | Died: refractory heart failure,<br>started sacubitril/valsartan as a<br>'last resort' |

|           |    |   |         |                                    |                                           | metoprolol, amiodarone                                                   |         |        |                                                          |
|-----------|----|---|---------|------------------------------------|-------------------------------------------|--------------------------------------------------------------------------|---------|--------|----------------------------------------------------------|
| <b>9</b>  | 36 | M | ccTGA   | Dextrocardia,<br>ccTGA, PA,<br>VSD | VSD closure,<br>homograft PV,<br>AVRepair | Perindopril                                                              |         | 97/103 |                                                          |
| <b>10</b> | 44 | M | Mustard | TGA                                |                                           | Aspirin, valsartan                                                       | CRT-D   | 97/103 |                                                          |
| <b>11</b> | 43 | M | Senning | TGA, VSD                           |                                           | Apixaban, irbesartan, bisoprolol                                         |         | 97/103 |                                                          |
| <b>12</b> | 49 | M | Mustard | TGA, VSD                           | VSD closure                               | Irbesartan, metoprolol, amiodarone                                       | DDD-ICD | 97/103 |                                                          |
| <b>13</b> | 45 | F | Senning | TGA, VSD, PS                       | PV repair                                 | Clopidogrel, irbesartan,<br>furosemide, spironolactone,<br>carvedilol    |         | 49/51  |                                                          |
| <b>14</b> | 46 | M | Mustard | TGA                                |                                           | Phenprocoumon, irbesartan,<br>bumetanide, metoprolol                     | DDD-ICD | 97/103 |                                                          |
| <b>15</b> | 43 | F | Senning | TGA, VSD, PS                       | VSD closure, PV<br>Repair                 | Phenprocoumon, perindopril,<br>bumetanide, spironolactone,<br>metoprolol | PM      | 24/26  | Multiple admissions for SVTs,<br>and ablation procedures |
| <b>16</b> | 49 | F | Mustard | TGA                                |                                           | Perindopril, furosemide, bisoprolol                                      | DDD-ICD | 97/103 | Admission for SVT with<br>inappropriate ICD shock        |
| <b>17</b> | 45 | F | ccTGA   | ccTGA, PS                          |                                           | Enalapril                                                                |         | 97/103 |                                                          |
| <b>18</b> | 56 | F | ccTGA   | Dextrocardia,<br>ccTGA, VSD, PS    | TVP                                       | Phenprocoumon, candesartan,<br>furosemide, spironolactone, digoxin       | CRT-D   | 24/26  |                                                          |
| <b>19</b> | 57 | M | ccTGA   | Dextroversion,<br>ccTGA, PS, ASD   | closure ASD, PV<br>repair                 | Acenocoumarol, irbesartan,<br>hydrochlorothiazide, simvastatin           |         | 97/103 |                                                          |
| <b>20</b> | 45 | M | ccTGA   | ccTGA, VSD                         | TVR                                       | Phenprocoumon, telmisartan                                               |         | 97/103 |                                                          |
